# Supplementary material
Source: Springer Nature journal article supplement (https://www.springermedizin.de/resource/supplementary/12904_2009_83_MOESM8_ESM.pdf/9518064)

# Mean days per patient

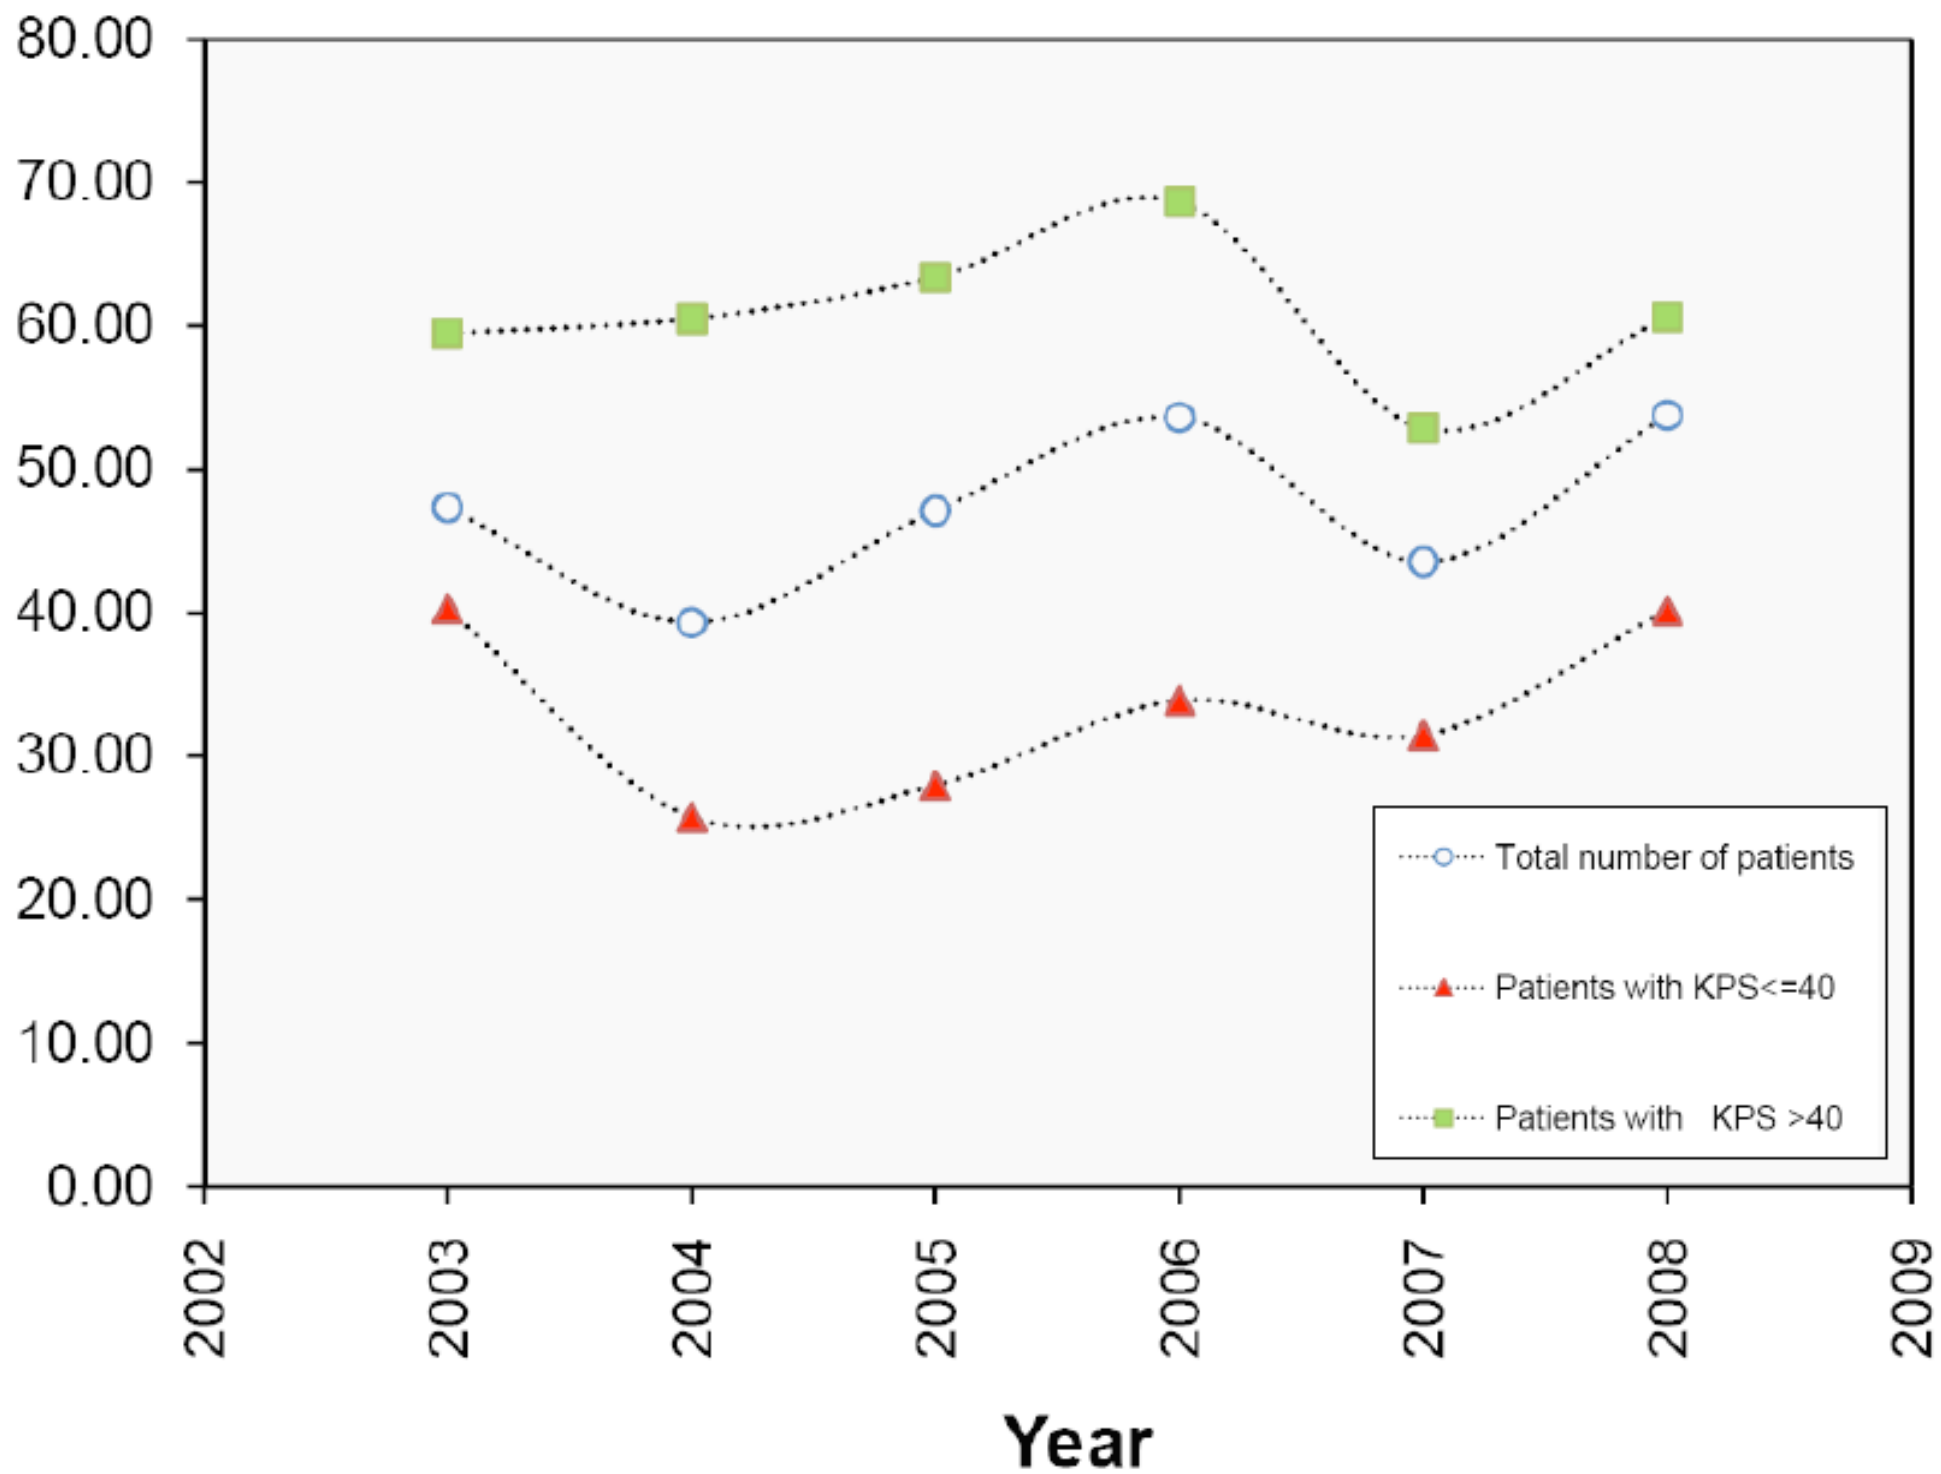

Supplement: MOESM8 [file 9518064]
